# Supplementary material for: Tumor Immune Microenvironment Heterogeneity at the Invasion Front and Tumor Center in Oral Squamous Cell Carcinoma as a Perspective of Managing This Cancer Entity
Source: MDPI journal article supplement (doi:10.3390/jcm12041704), 2023-02-20
Supplement: s1 [file s1]

**Table S1.** Patient characteristics according to dichotomized CD4+ tumor center and CD4+ invasion front cell counts.

| Variables/Categories      | CD4+ tumor center |             | CD4+ invasion front |             |
|---------------------------|-------------------|-------------|---------------------|-------------|
|                           | low               | high        | low                 | high        |
|                           | n (%)             | n (%)       | n (%)               | n (%)       |
| <b>Number of patients</b> | 32 (100.0%)       | 23 (100.0%) | 30 (100.0%)         | 25 (100.0%) |
| <b>Age</b>                |                   |             |                     |             |
| ≥70                       | 13 (40.6%)        | 7 (30.4%)   | 10 (33.3%)          | 10 (40.0%)  |
| <70                       | 19 (59.4%)        | 16 (69.6%)  | 20 (66.7%)          | 15 (60.0%)  |
| <b>Gender</b>             |                   |             |                     |             |
| male                      | 20 (62.5%)        | 19 (82.6%)  | 20 (66.7%)          | 19 (76.0%)  |
| female                    | 12 (37.5%)        | 4 (17.4%)   | 10 (33.3%)          | 6 (24.0%)   |
| <b>Tumor spread</b>       |                   |             |                     |             |
| 1                         | 10 (31.3%)        | 10 (43.5%)  | 11 (36.7%)          | 9 (36.0%)   |
| 2                         | 7 (21.9%)         | 8 (34.8%)   | 7 (23.3%)           | 8 (32.0%)   |
| 3                         | 4 (12.5%)         | 3 (13.0%)   | 3 (10.0%)           | 4 (16.0%)   |
| 4                         | 11 (34.4%)        | 2 (8.7%)    | 9 (30.0%)           | 4 (16.0%)   |
| <b>Nodal metastasis</b>   |                   |             |                     |             |
| 0                         | 19 (59.4%)        | 11 (47.8%)  | 19 (63.3%)          | 11 (44.0%)  |
| +                         | 13 (40.6%)        | 12 (52.2%)  | 11 (36.7%)          | 14 (56.0%)  |
| <b>Metastasis</b>         |                   |             |                     |             |
| no spread                 | 25 (78.1%)        | 15 (65.2%)  | 23 (76.7%)          | 17 (68.0%)  |
| any spread                | 2 (6.3%)          | 5 (21.7%)   | 2 (6.7%)            | 5 (20.0%)   |
| unknown                   | 5 (15.6%)         | 3 (13.0%)   | 5 (16.7%)           | 3 (12.0%)   |
| <b>Grade</b>              |                   |             |                     |             |
| 1                         | 2 (6.3%)          | 0 (0.0%)    | 1 (3.3%)            | 1 (4.0%)    |
| 2                         | 25 (78.1%)        | 19 (82.6%)  | 24 (80.0%)          | 20 (80.0%)  |
| 3                         | 5 (15.6%)         | 4 (17.4%)   | 5 (16.7%)           | 4 (16.0%)   |
| <b>Stage</b>              |                   |             |                     |             |
| I                         | 7 (21.9%)         | 8 (34.8%)   | 10 (33.3%)          | 5 (20.0%)   |
| II                        | 4 (12.5%)         | 2 (8.7%)    | 3 (10.0%)           | 3 (12.0%)   |
| III                       | 7 (21.9%)         | 4 (17.4%)   | 6 (20.0%)           | 5 (20.0%)   |
| IV                        | 14 (43.8%)        | 9 (39.1%)   | 11 (36.7%)          | 12 (48.0%)  |

**Table S2.** Patient characteristics according to dichotomized CD8+ tumor center and CD8+ invasion front cell counts.

| Variables/Categories      | CD8+ tumor center |             | CD8+ invasion front |             |
|---------------------------|-------------------|-------------|---------------------|-------------|
|                           | low               | high        | low                 | high        |
|                           | n (%)             | n (%)       | n (%)               | n (%)       |
| <b>Number of patients</b> | 32 (100.0%)       | 23 (100.0%) | 32 (100.0%)         | 23 (100.0%) |
| <b>Age</b>                |                   |             |                     |             |
| ≥70                       | 16 (50.0%)        | 4 (17.4%)   | 14 (43.8%)          | 6 (26.1%)   |
| <70                       | 16 (50.0%)        | 19 (82.6%)  | 18 (56.3%)          | 17 (73.9%)  |
| <b>Gender</b>             |                   |             |                     |             |
| male                      | 24 (75.0%)        | 15 (65.2%)  | 20 (62.5%)          | 19 (82.6%)  |
| female                    | 8 (25.0%)         | 8 (34.8%)   | 12 (37.5%)          | 4 (17.4%)   |
| <b>Tumor spread</b>       |                   |             |                     |             |
| 1                         | 11 (34.4%)        | 9 (39.1%)   | 13 (40.6%)          | 7 (30.4%)   |
| 2                         | 8 (25.0%)         | 7 (30.4%)   | 8 (25.0%)           | 7 (30.4%)   |
| 3                         | 3 (9.4%)          | 4 (17.4%)   | 4 (12.5%)           | 3 (13.0%)   |
| 4                         | 10 (31.3%)        | 3 (13.0%)   | 7 (21.9%)           | 6 (26.1%)   |
| <b>Nodal metastasis</b>   |                   |             |                     |             |
| 0                         | 16 (50.0%)        | 14 (60.9%)  | 16 (50.0%)          | 14 (60.9%)  |
| +                         | 16 (50.0%)        | 9 (39.1%)   | 16 (50.0%)          | 9 (39.1%)   |
| <b>Metastasis</b>         |                   |             |                     |             |
| no spread                 | 21 (65.6%)        | 19 (82.6%)  | 24 (75.0%)          | 16 (69.6%)  |
| any spread                | 6 (18.8%)         | 1 (4.3%)    | 4 (12.5%)           | 3 (13.0%)   |
| unknown                   | 5 (15.6%)         | 3 (13.0%)   | 4 (12.5%)           | 4 (17.4%)   |
| <b>Grade</b>              |                   |             |                     |             |
| 1                         | 1 (3.1%)          | 1 (4.3%)    | 1 (3.1%)            | 1 (4.3%)    |
| 2                         | 24 (75.0%)        | 20 (87.0%)  | 27 (84.4%)          | 17 (73.9%)  |
| 3                         | 7 (21.9%)         | 2 (8.7%)    | 4 (12.5%)           | 5 (21.7%)   |
| <b>Stage</b>              |                   |             |                     |             |
| I                         | 7 (21.9%)         | 8 (34.8%)   | 8 (25.0%)           | 7 (30.4%)   |
| II                        | 2 (6.3%)          | 4 (17.4%)   | 2 (6.3%)            | 4 (17.4%)   |
| III                       | 6 (18.8%)         | 5 (21.7%)   | 9 (28.1%)           | 2 (8.7%)    |
| IV                        | 17 (53.1%)        | 6 (26.1%)   | 13 (40.6%)          | 10 (43.5%)  |

**Table S3.** Patient characteristics according to dichotomized CD68+ tumor center and CD68+ invasion front cell counts.

| Variables/Categories      | CD68+ tumor center |             | CD68+ invasion front |             |
|---------------------------|--------------------|-------------|----------------------|-------------|
|                           | low                | high        | low                  | high        |
|                           | n (%)              | n (%)       | n (%)                | n (%)       |
| <b>Number of patients</b> | 34 (100.0%)        | 21 (100.0%) | 28 (100.0%)          | 27 (100.0%) |
| <b>Age</b>                |                    |             |                      |             |
| ≥70                       | 11 (32.4%)         | 9 (42.9%)   | 11 (39.3%)           | 9 (33.3%)   |
| <70                       | 23 (67.6%)         | 12 (57.1%)  | 17 (60.7%)           | 18 (66.7%)  |
| <b>Gender</b>             |                    |             |                      |             |
| male                      | 25 (73.5%)         | 14 (66.7%)  | 19 (67.9%)           | 20 (74.1%)  |
| female                    | 9 (26.5%)          | 7 (33.3%)   | 9 (32.1%)            | 7 (25.9%)   |
| <b>Tumor spread</b>       |                    |             |                      |             |
| 1                         | 11 (32.4%)         | 9 (42.9%)   | 11 (39.3%)           | 9 (33.3%)   |
| 2                         | 9 (26.5%)          | 6 (28.6%)   | 7 (25.0%)            | 8 (29.6%)   |
| 3                         | 3 (8.8%)           | 4 (19.0%)   | 3 (10.7%)            | 4 (14.8%)   |
| 4                         | 11 (32.4%)         | 2 (9.5%)    | 7 (25.0%)            | 6 (22.2%)   |
| <b>Nodal metastasis</b>   |                    |             |                      |             |
| 0                         | 16 (47.1%)         | 14 (66.7%)  | 14 (50.0%)           | 16 (59.3%)  |
| +                         | 18 (52.9%)         | 7 (33.3%)   | 14 (50.0%)           | 11 (40.7%)  |
| <b>Metastasis</b>         |                    |             |                      |             |
| no spread                 | 26 (76.5%)         | 14 (66.7%)  | 22 (78.6%)           | 18 (66.7%)  |
| any spread                | 5 (14.7%)          | 2 (9.5%)    | 4 (14.3%)            | 3 (11.1%)   |
| unknown                   | 3 (8.8%)           | 5 (23.8%)   | 2 (7.1%)             | 6 (22.2%)   |
| <b>Grade</b>              |                    |             |                      |             |
| 1                         | 0 (0.0%)           | 2 (9.5%)    | 0 (0.0%)             | 2 (7.4%)    |
| 2                         | 27 (79.4%)         | 17 (81.0%)  | 22 (78.6%)           | 22 (81.5%)  |
| 3                         | 7 (20.6%)          | 2 (9.5%)    | 6 (21.4%)            | 3 (11.1%)   |
| <b>Stage</b>              |                    |             |                      |             |
| I                         | 8 (23.5%)          | 7 (33.3%)   | 8 (28.6%)            | 7 (25.9%)   |
| II                        | 2 (5.9%)           | 4 (19.0%)   | 3 (10.7%)            | 3 (11.1%)   |
| III                       | 6 (17.6%)          | 5 (23.8%)   | 7 (25.0%)            | 4 (14.8%)   |
| IV                        | 18 (52.9%)         | 5 (23.8%)   | 10 (35.7%)           | 13 (48.1%)  |

**Table S4.** Patient characteristics according to dichotomized CD163+ tumor center and CD163+ invasion front cell counts.

| Variables/Categories      | CD163+ tumor center |             | CD163+ invasion front |             |
|---------------------------|---------------------|-------------|-----------------------|-------------|
|                           | low                 | high        | low                   | high        |
|                           | n (%)               | n (%)       | n (%)                 | n (%)       |
| <b>Number of patients</b> | 33 (100.0%)         | 22 (100.0%) | 25 (100.0%)           | 30 (100.0%) |
| <b>Age</b>                |                     |             |                       |             |
| ≥70                       | 11 (33.3%)          | 9 (40.9%)   | 9 (36.0%)             | 11 (36.7%)  |
| <70                       | 22 (66.7%)          | 13 (59.1%)  | 16 (64.0%)            | 19 (63.3%)  |
| <b>Gender</b>             |                     |             |                       |             |
| male                      | 24 (72.7%)          | 15 (68.2%)  | 19 (76.0%)            | 20 (66.7%)  |
| female                    | 9 (27.3%)           | 7 (31.8%)   | 6 (24.0%)             | 10 (33.3%)  |
| <b>Tumor spread</b>       |                     |             |                       |             |
| 1                         | 12 (36.4%)          | 8 (36.4%)   | 9 (36.0%)             | 11 (36.7%)  |
| 2                         | 8 (24.2%)           | 7 (31.8%)   | 8 (32.0%)             | 7 (23.3%)   |
| 3                         | 4 (12.1%)           | 3 (13.6%)   | 2 (8.0%)              | 5 (16.7%)   |
| 4                         | 9 (27.3%)           | 4 (18.2%)   | 6 (24.0%)             | 7 (23.3%)   |
| <b>Nodal metastasis</b>   |                     |             |                       |             |
| 0                         | 19 (57.6%)          | 11 (50.0%)  | 10 (40.0%)            | 20 (66.7%)  |
| +                         | 14 (42.4%)          | 11 (50.0%)  | 15 (60.0%)            | 10 (33.3%)  |
| <b>Metastasis</b>         |                     |             |                       |             |
| no spread                 | 25 (75.8%)          | 15 (68.2%)  | 19 (76.0%)            | 21 (70.0%)  |
| any spread                | 4 (12.1%)           | 3 (13.6%)   | 4 (16.0%)             | 3 (10.0%)   |
| unknown                   | 4 (12.1%)           | 4 (18.2%)   | 2 (8.0%)              | 6 (20.0%)   |
| <b>Grade</b>              |                     |             |                       |             |
| 1                         | 0 (0.0%)            | 2 (9.1%)    | 0 (0.0%)              | 2 (6.7%)    |
| 2                         | 28 (84.8%)          | 16 (72.7%)  | 21 (84.0%)            | 23 (76.7%)  |
| 3                         | 5 (15.2%)           | 4 (18.2%)   | 4 (16.0%)             | 5 (16.7%)   |
| <b>Stage</b>              |                     |             |                       |             |
| I                         | 10 (30.3%)          | 5 (22.7%)   | 6 (24.0%)             | 9 (30.0%)   |
| II                        | 3 (9.1%)            | 3 (13.6%)   | 1 (4.0%)              | 5 (16.7%)   |
| III                       | 5 (15.2%)           | 6 (27.3%)   | 6 (24.0%)             | 5 (16.7%)   |
| IV                        | 15 (45.5%)          | 8 (36.4%)   | 12 (48.0%)            | 11 (36.7%)  |

**Table S5.** Patient characteristics according to dichotomized M1 tumor center and M1 invasion front cell counts.

| Variables/Categories      | M1 tumor center |             | M1 invasion front |             |
|---------------------------|-----------------|-------------|-------------------|-------------|
|                           | low             | high        | low               | high        |
|                           | n (%)           | n (%)       | n (%)             | n (%)       |
| <b>Number of patients</b> | 38 (100.0%)     | 17 (100.0%) | 35 (100.0%)       | 20 (100.0%) |
| <b>Age</b>                |                 |             |                   |             |
| ≥70                       | 12 (31.6%)      | 8 (47.1%)   | 13 (37.1%)        | 7 (35.0%)   |
| <70                       | 26 (68.4%)      | 9 (52.9%)   | 22 (62.9%)        | 13 (65.0%)  |
| <b>Gender</b>             |                 |             |                   |             |
| male                      | 30 (78.9%)      | 9 (52.9%)   | 23 (65.7%)        | 16 (80.0%)  |
| female                    | 8 (21.1%)       | 8 (47.1%)   | 12 (34.3%)        | 4 (20.0%)   |
| <b>Tumor spread</b>       |                 |             |                   |             |
| 1                         | 12 (31.6%)      | 8 (47.1%)   | 14 (40.0%)        | 6 (30.0%)   |
| 2                         | 11 (28.9%)      | 4 (23.5%)   | 9 (25.7%)         | 6 (30.0%)   |
| 3                         | 5 (13.2%)       | 2 (11.8%)   | 4 (11.4%)         | 3 (15.0%)   |
| 4                         | 10 (26.3%)      | 3 (17.6%)   | 8 (22.9%)         | 5 (25.0%)   |
| <b>Nodal metastasis</b>   |                 |             |                   |             |
| 0                         | 19 (50.0%)      | 11 (64.7%)  | 18 (51.4%)        | 12 (60.0%)  |
| +                         | 19 (50.0%)      | 6 (35.3%)   | 17 (48.6%)        | 8 (40.0%)   |
| <b>Metastasis</b>         |                 |             |                   |             |
| no spread                 | 28 (73.7%)      | 12 (70.6%)  | 25 (71.4%)        | 15 (75.0%)  |
| any spread                | 6 (15.8%)       | 1 (5.9%)    | 6 (17.1%)         | 1 (5.0%)    |
| unknown                   | 4 (10.5%)       | 4 (23.5%)   | 4 (11.4%)         | 4 (20.0%)   |
| <b>Grade</b>              |                 |             |                   |             |
| 1                         | 0 (0.0%)        | 2 (11.8%)   | 1 (2.9%)          | 1 (5.0%)    |
| 2                         | 31 (81.6%)      | 13 (76.5%)  | 28 (80.0%)        | 16 (80.0%)  |
| 3                         | 7 (18.4%)       | 2 (11.8%)   | 6 (17.1%)         | 3 (15.0%)   |
| <b>Stage</b>              |                 |             |                   |             |
| I                         | 9 (23.7%)       | 6 (35.3%)   | 9 (25.7%)         | 6 (30.0%)   |
| II                        | 3 (7.9%)        | 3 (17.6%)   | 5 (14.3%)         | 1 (5.0%)    |
| III                       | 7 (18.4%)       | 4 (23.5%)   | 6 (17.1%)         | 5 (25.0%)   |
| IV                        | 19 (50.0%)      | 4 (23.5%)   | 15 (42.9%)        | 8 (40.0%)   |
